# Supplementary material for: Monodisperse mesoporous cobalt ferrite nanoparticles: synthesis and application in targeted delivery of antitumor drugs
Source: Royal Society of Chemistry journal article supplement (doi:10.1039/c1jm10732a), 2011-01-01
Supplement: c1jm10732a.pdf [file c1jm10732a.pdf]

Electronic Supplementary Information

## Monodisperse mesoporous cobalt ferrite nanoparticles: Synthesis and application in targeted delivery of antitumor drugs

Sasmita Mohapatra,<sup>\*a</sup> Smruti R. Rout,<sup>a</sup> Swatilekha Maiti,<sup>b</sup> Tapas K. Maiti<sup>b</sup> and Asit B. Panda<sup>c</sup>

<sup>a</sup> Department of Chemistry, National Institute of Technology, Rourkela, India-769008

<sup>b</sup> Department of Biotechnology, Indian Institute of Technology, Kharagpur, India-721302

<sup>c</sup> Central Salt and Marine Chemicals Research Institute, Bhavnagar, Gujarat, India-364021

Figure S1

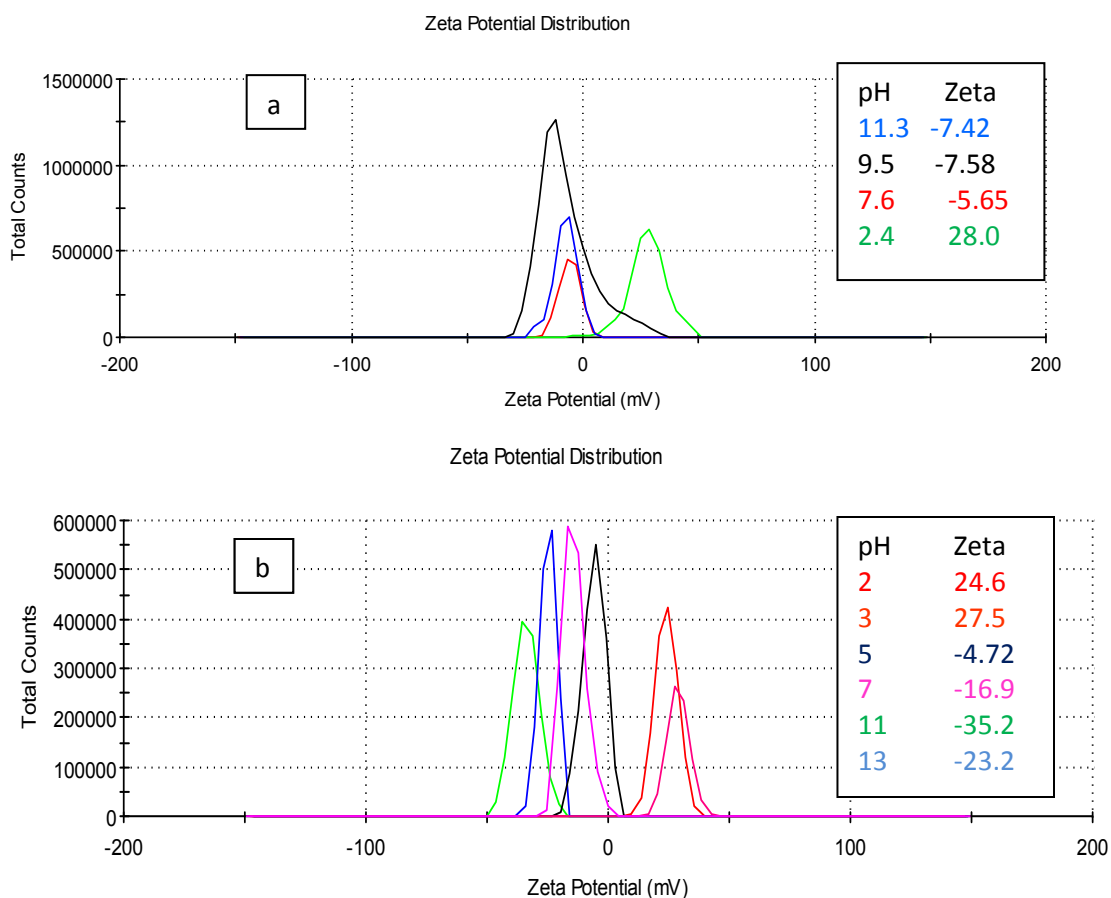

**Figure S1** Change in zeta potential with respect to pH (a) as synthesized  $\text{CoFe}_2\text{O}_4$  nanoparticles (b) after treated with succinic anhydride.

**Figure S2**

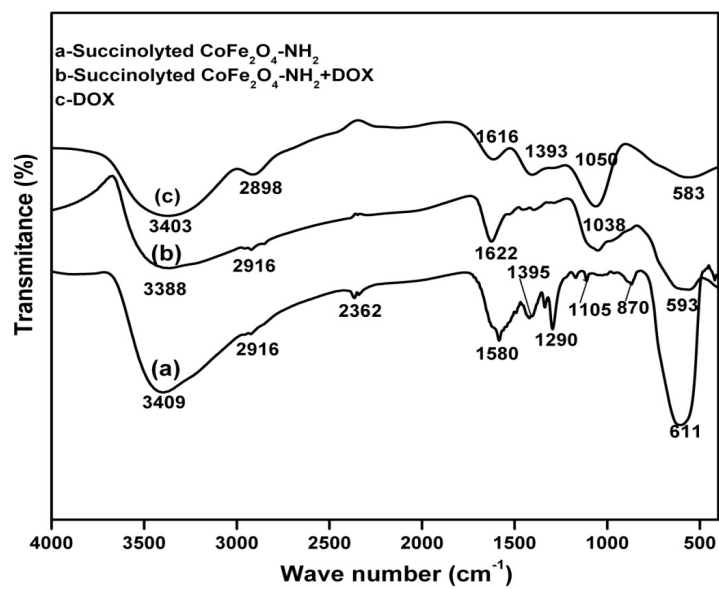

**Figure S2** FTIR spectra demonstrating conjugation of doxorubicin on -COOH functionalized nanoparticles

**Figure S3**

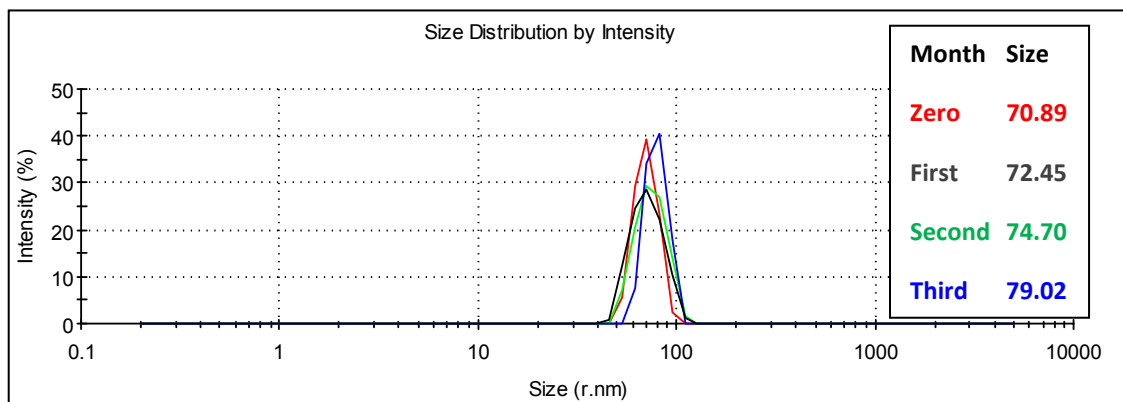

Figure S3 Change in HD size of DOX loaded particles with time

**Figure S4**

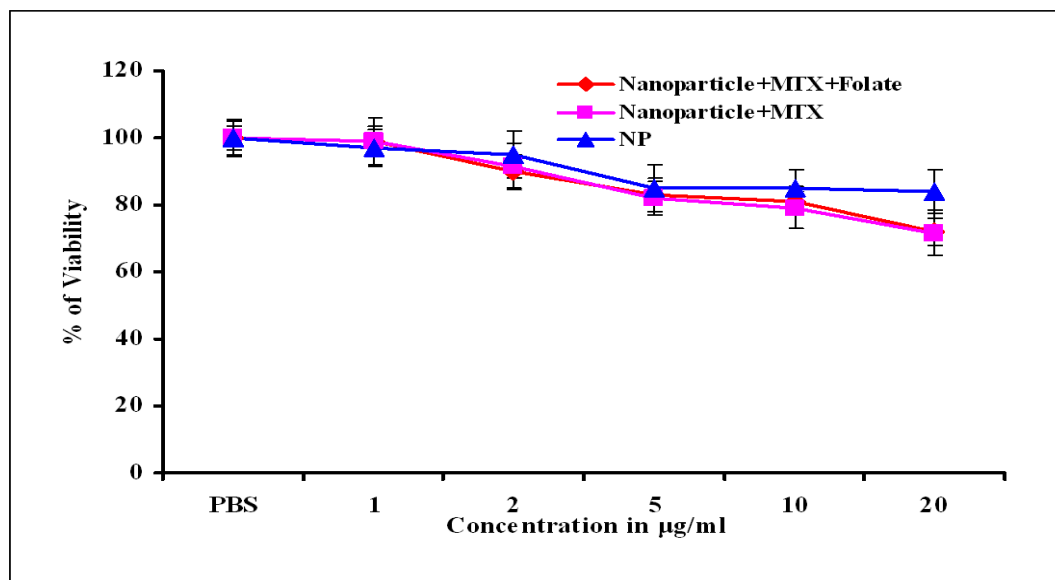

**Figure S4** Cytotoxicity assay of nanoparticles on NIH/3T3 cells. Cells were treated with different concentrations of nanoparticles for 72 h and cell viability was measured by MTT assay.

**Figure S5**

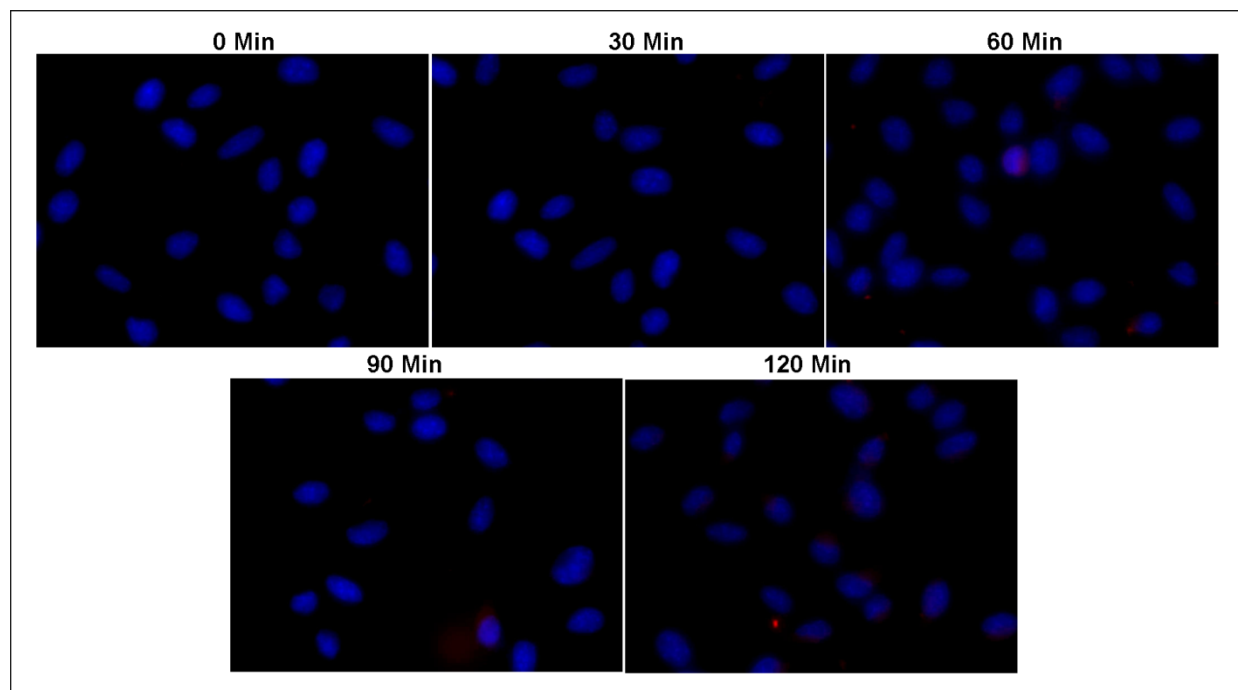

**Figure S5** Uptake study of nanoparticle in NIH/3T<sub>3</sub> cells using fluorescence microscopy. Cells were incubated with CoFe<sub>2</sub>O<sub>4</sub>-FA-RITC-MTX nanoparticles for different time intervals and observed under fluorescence microscope (200X).

## Calculation of drug loading capacity

The drug loading capacity was calculated as per the following method. First,  $\text{NH}_2$  /-COOH functionalized particles were conjugated with MTX/DOX as described in the experimental section and then separated from the aqueous suspension medium using magnetic separator (Invitrogen). The obtained drug-loaded  $\text{CoFe}_2\text{O}_4$  nanoparticles were incubated at 60 °C in vacuum overnight and were weighted. Drug concentration in supernatant was analyzed by the ultraviolet absorption ( $\lambda_{\text{MTX}} = 270 \text{ nm}$ ,  $\lambda_{\text{DOX}} = 255 \text{ nm}$ ), with reference to a calibration curve on a UV-Vis-NIR spectrophotometer. The measurements were performed in triplicate. Drug-loading content and encapsulation efficiency were obtained by eqs 1 and 2, respectively [1,2].

## Doxorubicin

$$\begin{aligned} \text{Drug-loading content (\%)} &= \frac{\text{Weight of the drug in nanoparticles}}{\text{weight of the nanoparticles}} \times 100 \dots\dots(1) \\ &= \frac{0.00944}{0.0697} \times 100 \\ &= 13.54 \% \end{aligned}$$

$$\begin{aligned} \text{Encapsulation efficiency (\%)} &= \frac{\text{Weight of the drug in nanoparticles}}{\text{Weight of the feeding drug}} \times 100 \dots\dots\dots (2) \\ &= \frac{0.00944}{0.0118} \times 100 = 80\% \end{aligned}$$

## Methotrexate

Drug-loading content (%) = 13.8 %

Encapsulation efficiency= 80%

**Table 1**

**Approximate estimation of functional groups/molecules on the surfaces of synthesized nanoparticles, ND (not determined)**

| Nanoparticles                                 | -NH <sub>2</sub> | FA   | RITC | MTX  | -COOH | DOX  |
|-----------------------------------------------|------------------|------|------|------|-------|------|
| CoFe <sub>2</sub> O <sub>4</sub>              | 490              | ---- | ---- | ---- | ----  | ---- |
| CoFe <sub>2</sub> O <sub>4</sub> -FA          | 352.8            | 120  | ---- | ---- | ND    | ND   |
| CoFe <sub>2</sub> O <sub>4</sub> -FA-RITC     | 321.9            | 120  | 46   | ND   | ND    | ND   |
| CoFe <sub>2</sub> O <sub>4</sub> -FA-RITC-MTX | 40.8             | 120  | 46   | 280  | ND    | ND   |
| CoFe <sub>2</sub> O <sub>4</sub> -FA-COOH     | 34               | 120  | 46   | ---- | 325   | ---- |
| CoFe <sub>2</sub> O <sub>4</sub> -FA-DOX      | 34               | 112  | 46   | ---- | 25    | 298  |

## Reference

1. Wang Wei, Zou M, and Chen K, Novel Fe<sub>3</sub>O<sub>4</sub>@YPO<sub>4</sub>:Re (Re = Tb, Eu) multifunctional magnetic–fluorescent hybrid spheres for biomedical applications, *Chem. Comm.* 2010; 46: 5100-5102.
2. Li S, Ma Y, Yue X, Cao Z and Dai Z, One-pot construction of doxorubicin conjugated magnetic silica nanoparticles, *New Journal of Chemistry*, 2009; 33: 2414-2418.
